# Supplementary material
Source: HighWire-hosted journal article supplement (https://erj.ersjournals.com/content/55/1/1902503)
Supplement: inline-supplementary-material-1 [file inline-supplementary-material-1.pdf]

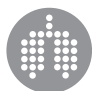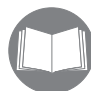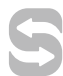

SHAREABLE PDF

# The evolution of the *European Respiratory Journal*: ready for the new decade!

James D. Chalmers<sup>1</sup>, Elin L. Reeves<sup>2</sup>, Neil J. Bullen<sup>2</sup> and Martin Kolb <sup>3</sup>

**Affiliations:** <sup>1</sup>Division of Molecular and Clinical Medicine, University of Dundee, Ninewells Hospital and Medical School, Dundee, UK. <sup>2</sup>European Respiratory Society, Publications Office, Sheffield, UK. <sup>3</sup>Dept of Respiratory Medicine, Pathology and Molecular Medicine, McMaster University and St Joseph's Healthcare, Hamilton, ON, Canada.

**Correspondence:** Martin Kolb, Dept of Respiratory Medicine, Pathology and Molecular Medicine, McMaster University and St Joseph's Healthcare, Hamilton, ON, Canada. E-mail: kolbm@mcmaster.ca

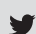

@ERSpublications

The ERJ editors wish all readers, authors, reviewers and editors a happy and successful 2020, and are ready to continue their work into the new decade! <http://bit.ly/36AbocX>

**Cite this article as:** Chalmers JD, Reeves EL, Bullen NJ, *et al.* The evolution of the *European Respiratory Journal*: ready for the new decade! *Eur Respir J* 2020; 55: 1902503 [<https://doi.org/10.1183/13993003.02503-2019>].

This single-page version can be shared freely online.

It has already been 2 years since we took the privilege of leading the *European Respiratory Journal* and we want to wish all of our readers, authors, reviewers and editors a very happy and successful 2020. It has been another busy and successful year at the journal.
